# Supplementary material for: Amelogenin Supramolecular Assembly in Nanospheres Defined by a Complex Helix-Coil-PPII Helix 3D-Structure
Source: PubMed Central journal article supplement (PMC3184955; doi:10.1371/journal.pone.0024952), 2011-10-03

**Figure S1. Graphic Illustration of Amelogenin Chemical Shifts.**

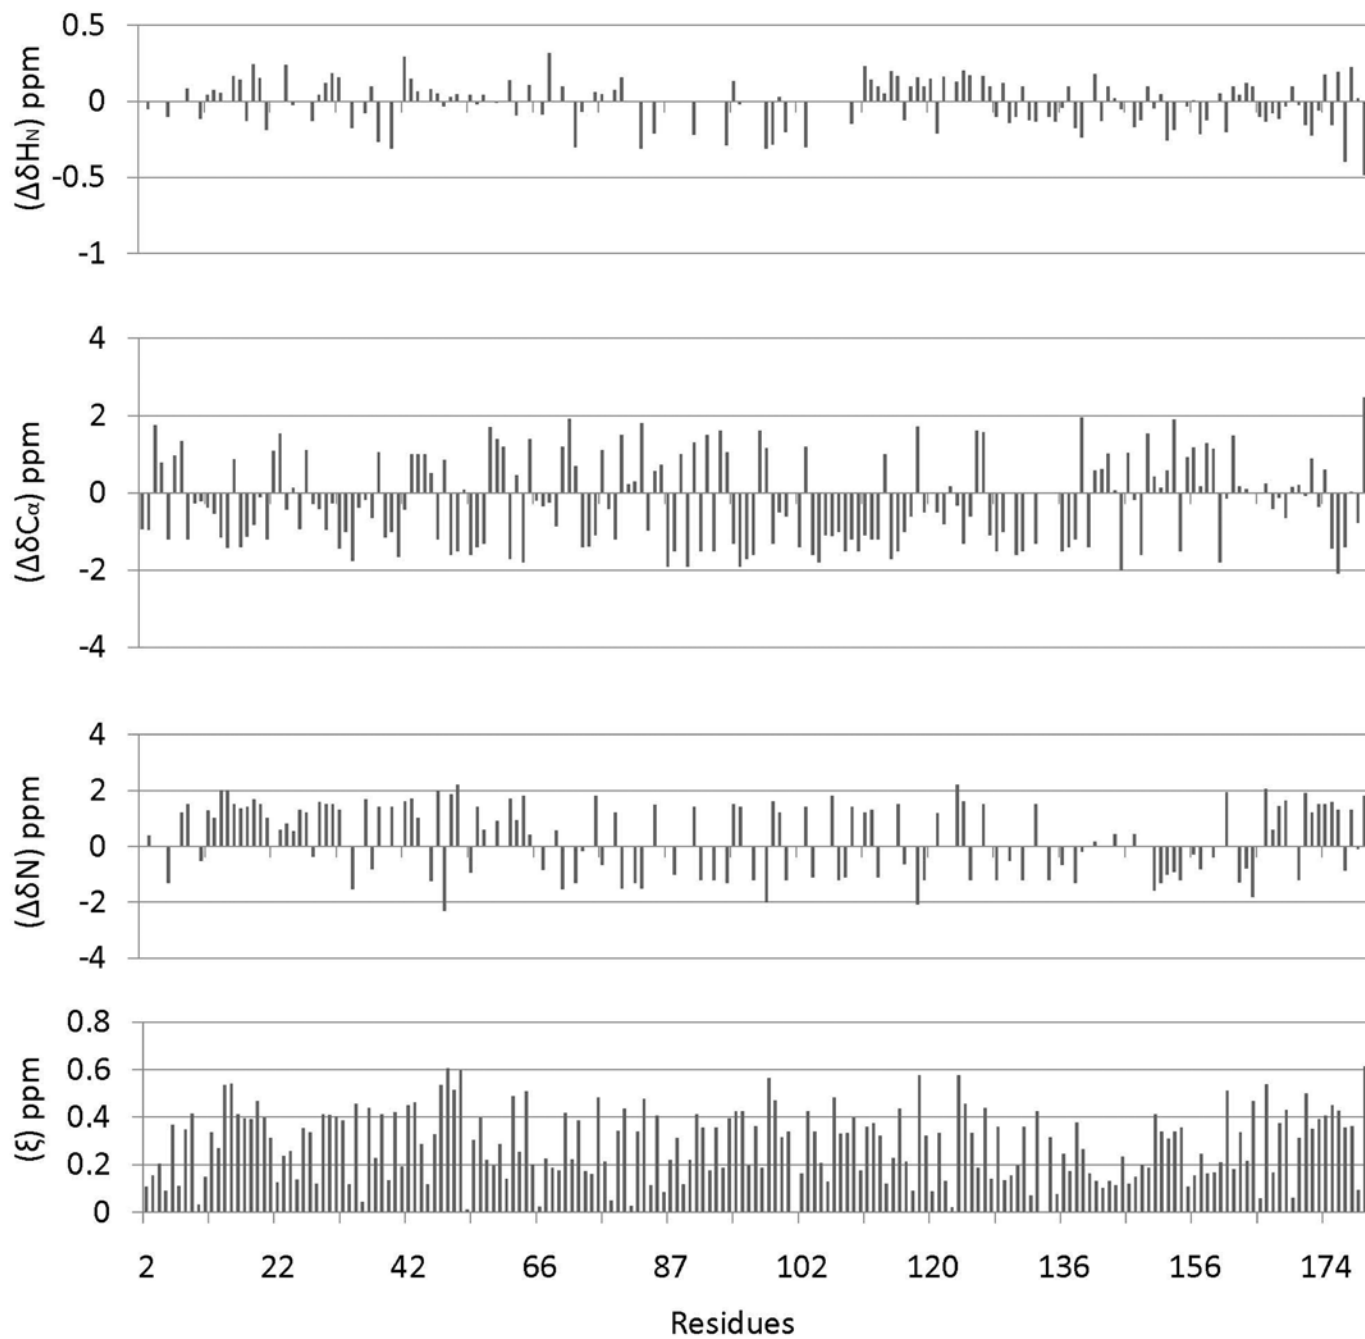

Supplement: pone.0024952.s001.pdf [file pone.0024952.s001.pdf]
