# Supplementary material for: Amelogenin Supramolecular Assembly in Nanospheres Defined by a Complex Helix-Coil-PPII Helix 3D-Structure
Source: PubMed Central journal article supplement (PMC3184955; doi:10.1371/journal.pone.0024952), 2011-10-03
Supplement: pone.0024952.s002.pdf [file pone.0024952.s002.pdf]

**Table S1.** Comparison between chemical shifts between overlapping areas of the three amelogenin fragments employed in the present study

| <b>HSQC</b> | <b>N-domain</b>      | <b>M-domain</b>      | <b>C-domain</b>      |
|-------------|----------------------|----------------------|----------------------|
| <b>Y34</b>  | H7.8 ppm N122 ppm    | H7.8 ppm N123 ppm    |                      |
| <b>Y37</b>  | H7.97 ppm N121.2 ppm | H7.97 ppm N121.3 ppm |                      |
| <b>Y39</b>  | H7.8 ppm N119.6 ppm  | H7.8 ppm N119.8 ppm  |                      |
| <b>H91</b>  |                      | H8.2 ppm N118.2 ppm  | H8.1 ppm N119 ppm    |
| <b>T95</b>  |                      | H8.17 ppm N118.2 ppm | H8.17 ppm N118.2 ppm |
| <b>T97</b>  |                      | H8.1 ppm N114.4 ppm  | H8.1 ppm N114.2 ppm  |
